# Supplementary material for: Skin Temperature in Parkinson’s Disease Measured by Infrared Thermography
Source: Hindawi journal article supplement (doi:10.1155/2020/2349469), 2020-07-25

T4

T6

T8

T10

1<sup>st</sup> finger  
phalanx2<sup>nd</sup> finger  
phalanx3<sup>rd</sup> finger  
phalanx4<sup>th</sup> finger  
phalanx5<sup>th</sup> finger  
phalanx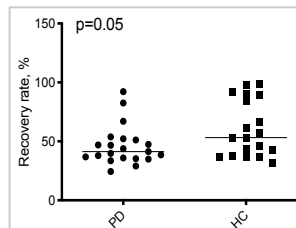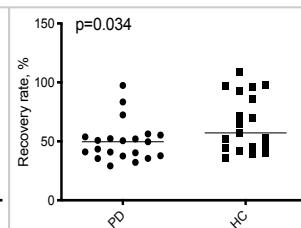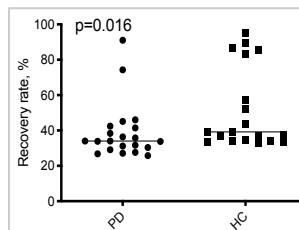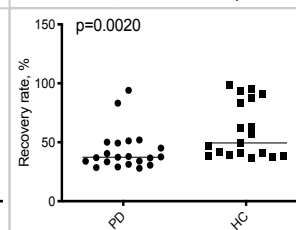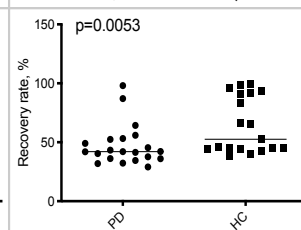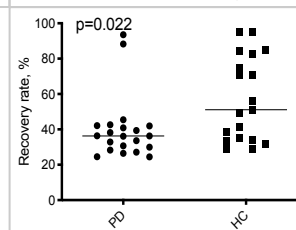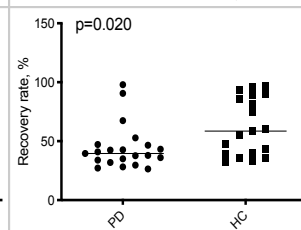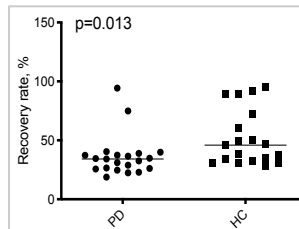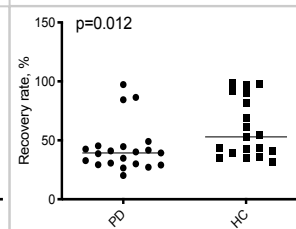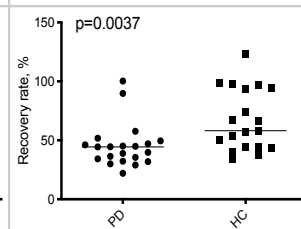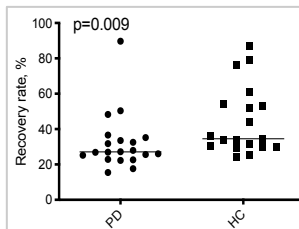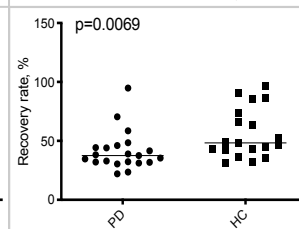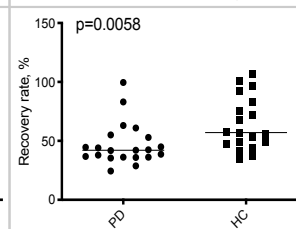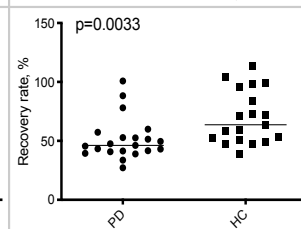

Supplement: f1 [file 2349469.f1.pdf]
